# Supplementary material for: Gut Microbiota and Transcriptomics Reveal the Effect of Human Norovirus Bioaccumulation on Oysters (Crassostrea gigas)
Source: PubMed Central journal article supplement (PMC9431538; doi:10.1128/spectrum.00161-22), 2022-07-05
Supplement: spectrum.00161-22-s0001.pdf [file spectrum.00161-22-s0001.pdf]

Table S1 HuNoV changes the diversity of gut microbiota in oysters

| Group   | Reads      | Good's coverage | OTUs   | Abundance |        | Diversity |           |
|---------|------------|-----------------|--------|-----------|--------|-----------|-----------|
|         |            |                 |        | Chao      | ACE    | Shannon   | Simpson   |
| Control | 40954±2808 | 0.9985±0.0004   | 324±37 | 363±47    | 366±45 | 2.28±0.21 | 0.34±0.05 |
| C6h     | 40872±2179 | 0.9982±0.0004   | 285±27 | 327±43    | 331±41 | 2.01±0.18 | 0.38±0.05 |
| C24h    | 40578±2568 | 0.9987±0.0003   | 312±32 | 362±38    | 364±32 | 2.17±0.22 | 0.36±0.04 |
| D6h     | 39194±3072 | 0.9984±0.0004   | 306±25 | 359±39    | 353±37 | 1.75±0.23 | 0.43±0.04 |
| D24h    | 40295±2109 | 0.9989±0.0003   | 177±14 | 221±25    | 220±24 | 1.16±0.17 | 0.52±0.05 |

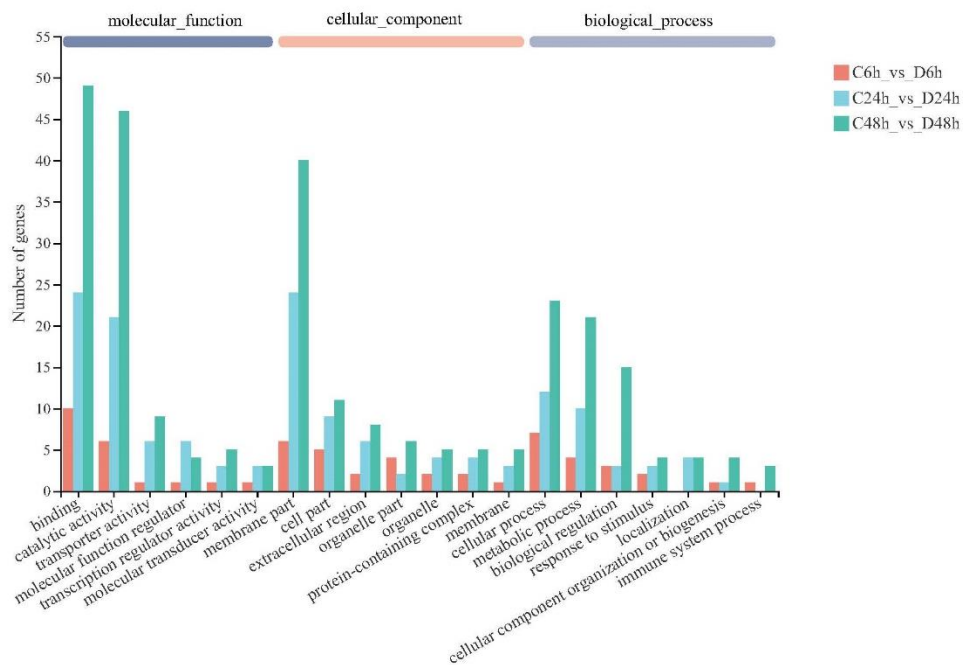

Fig. S1 GO annotation analysis of DEGs affected with HuNoV
